# Supplementary material for: Interactions of noncanonical motifs with hnRNP A2 promote activity-dependent RNA transport in neurons
Source: PubMed Central journal article supplement — J Cell Biol. 2014 May 26;205(4):493–510. doi: 10.1083/jcb.201310045 (PMC4033767; doi:10.1083/jcb.201310045), 2014-05-26
Supplement: supp_jcb.201310045_JCB_201310045_sm.pdf [file supp_jcb.201310045_JCB_201310045_sm.pdf]

Muslimov et al., <http://www.jcb.org/cgi/content/full/jcb.201310045/DC1>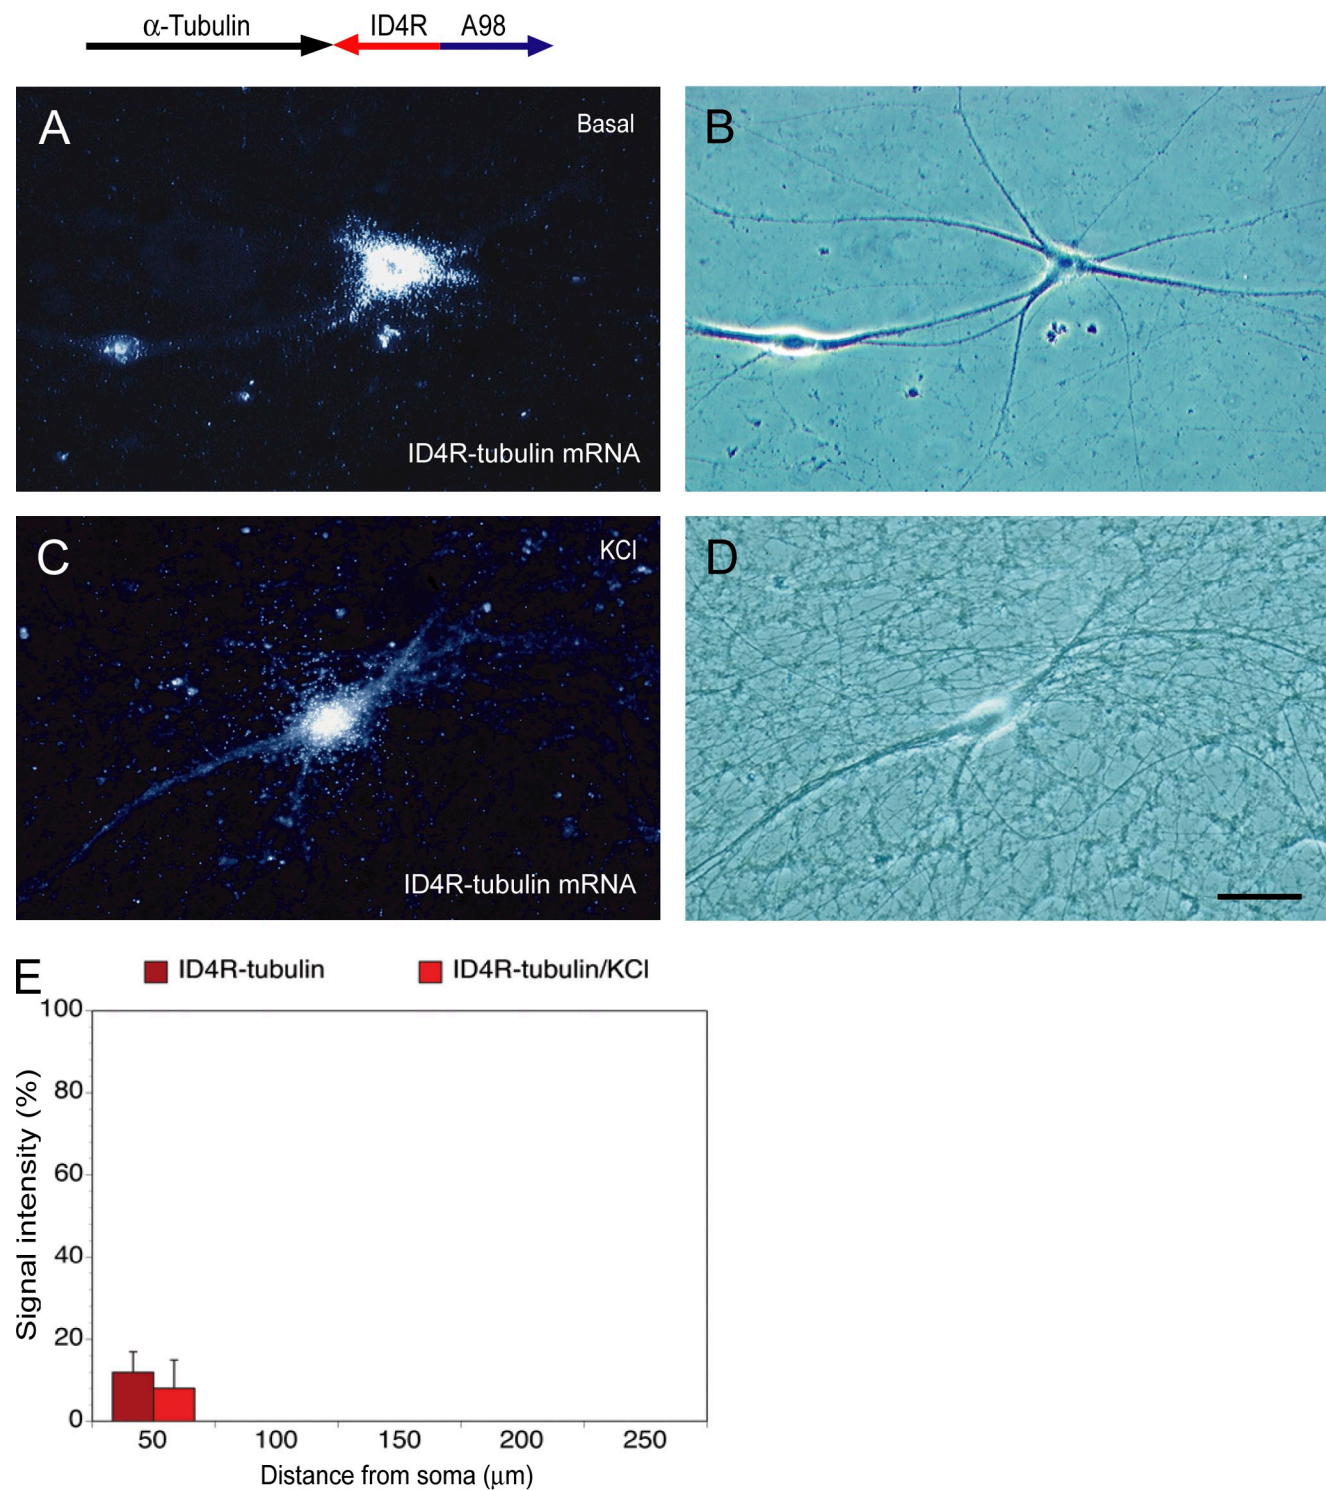

Figure S1. **Somatic retention of reverse complementary ID4-chimeric mRNA.** (A–D) Microinjected ID4R-chimeric  $\alpha$ -tubulin mRNA (see sketch) did not substantially exit neuronal somata of sympathetic neurons in culture either under basal conditions (A and B) or under conditions of  $K^+$  depolarization (C and D). Number of cells analyzed: [A and B] 16 neurons, 59 dendrites; [C and D] 13 neurons, 49 dendrites. Bar, 50  $\mu$ m. (E) Quantitative analysis: one-way ANOVA, Dunnett's post hoc analysis (comparison of RNA levels in the basal state [A and B] with RNA levels after  $K^+$  depolarization [C and D]):  $P > 0.9$  for interval points 50  $\mu$ m. Error bars indicate SEM.

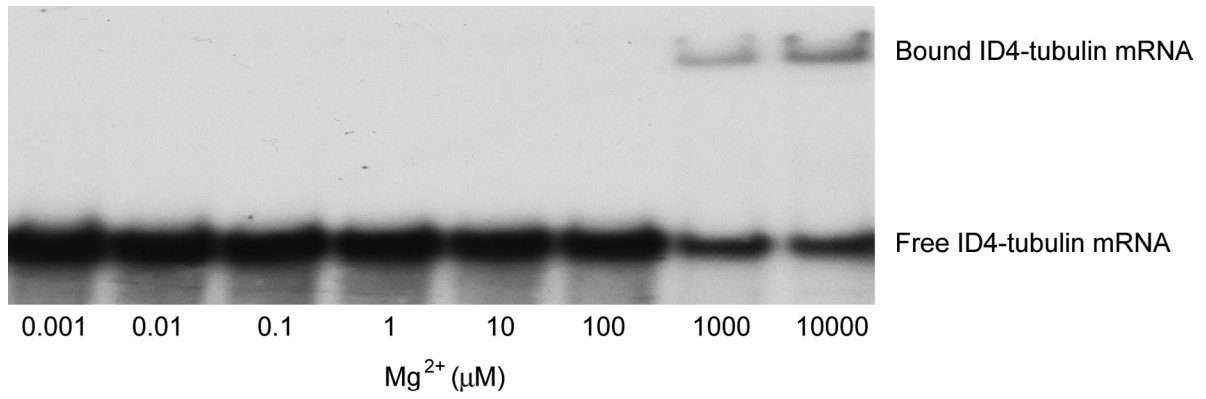

Figure S2.  **$Mg^{2+}$  ions promote binding of ID4 mRNA to hnRNP A2 in the millimolar concentration range but not in the micromolar or nanomolar concentration ranges.** In EMSA experiments, mobility shifts indicating binding of ID4-chimeric  $\alpha$ -tubulin mRNA to hnRNP A2 were not observed at  $Mg^{2+}$  concentrations <1 mM.

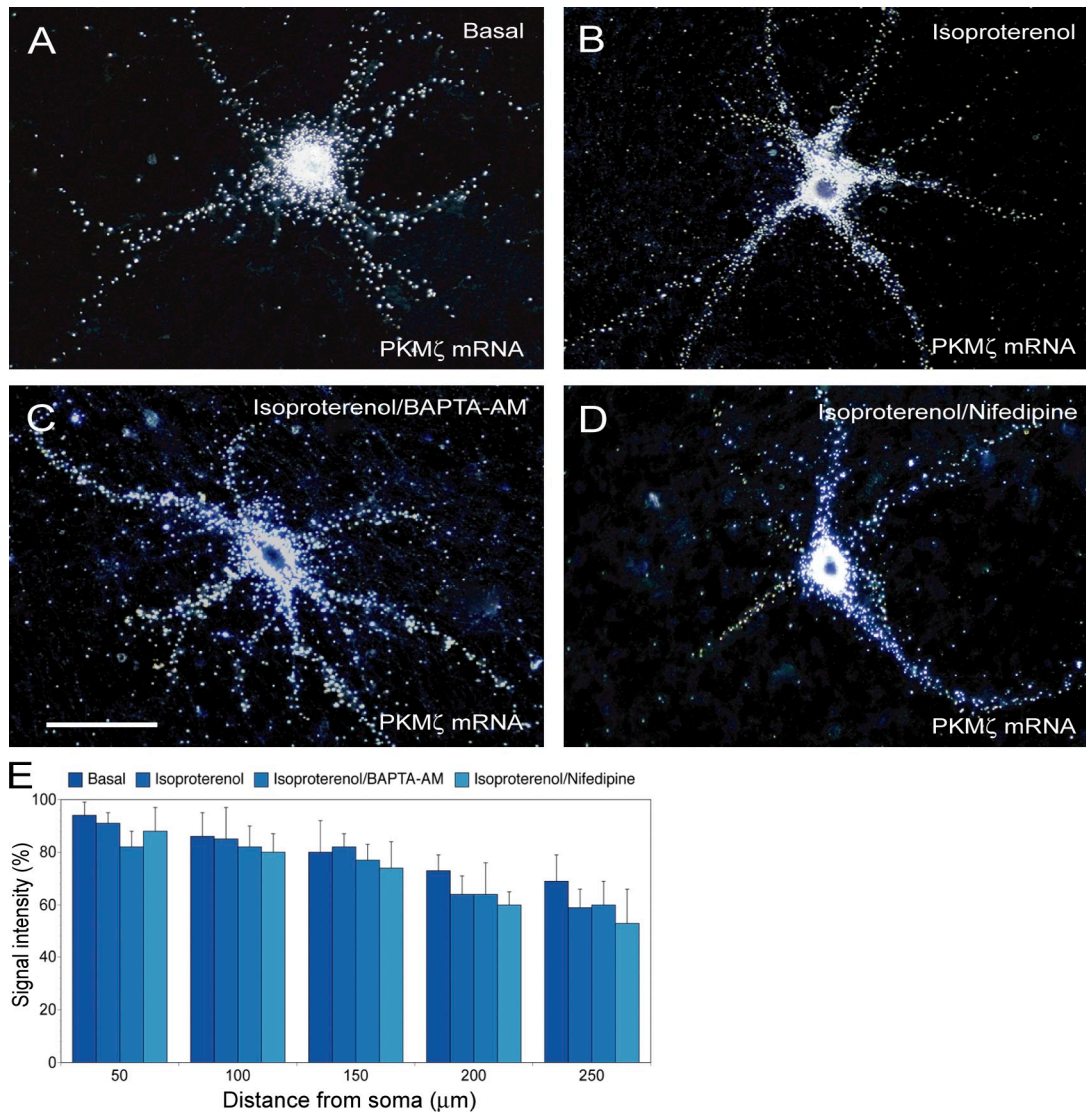

Figure S3. **Dendritic transport of PKM $\zeta$  mRNA is constitutive and remains unaltered under conditions of Ca<sup>2+</sup> chelation or L-type VDCC blockade.** (A) PKM $\zeta$  mRNA was delivered along dendrites after microinjection into sympathetic neurons in culture. (B–D) No changes were observed in extent or pattern of dendritic labeling after application of  $\beta$ -AR agonist isoproterenol (B), application of isoproterenol after preincubation with intracellular Ca<sup>2+</sup> chelator BAPTA-AM (C), or application of isoproterenol after preincubation with L-type VDCC blocker nifedipine (D) or nimodipine (not depicted). Number of cells analyzed: (A) 9 cells, 31 dendrites; (B) 9 cells, 33 dendrites; (C) 10 cells, 34 dendrites; (D) 11 cells, 37 dendrites. Bar, 50  $\mu$ m. (E) Quantitative analysis. One-way ANOVA, Dunnett's post hoc analysis (comparison of RNA levels in the basal state with RNA levels after  $\beta$ -adrenergic activation and after  $\beta$ -adrenergic activation in the presence of BAPTA-AM or nifedipine): comparison with isoproterenol (B),  $P > 0.6$  for all interval points; comparison with isoproterenol/BAPTA-AM (C),  $P > 0.7$  for all interval points; comparison with isoproterenol/nifedipine (D),  $P > 0.7$  for all interval points. Error bars indicate SEM.

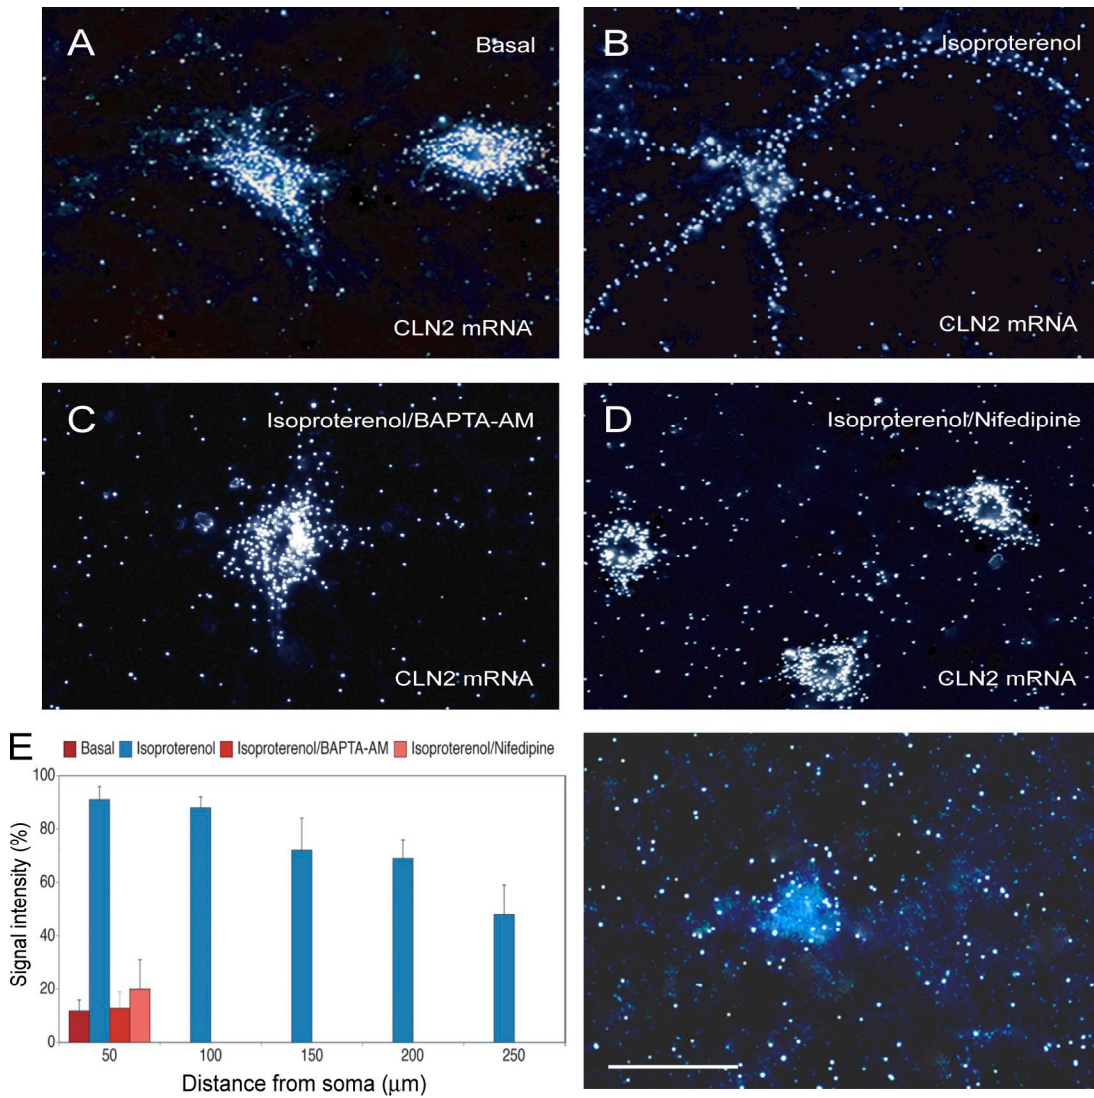

Figure S4. **Endogenous CLN2 mRNA is targeted to dendrites after  $\beta$ -adrenergic activation in sympathetic neurons.** In situ hybridization was performed with a probe specific for rat CLN2 mRNA. (A and B) Localization of endogenous CLN2 mRNA remained somatic under basal conditions (A) but was dendritic after  $\beta$ -adrenergic activation (B). (C and D) Isoproterenol-induced dendritic localization was prevented by preincubation with intracellular  $\text{Ca}^{2+}$  chelator BAPTA-AM (C) and by preincubation with L-type VDCC blocker nifedipine (D) or nimodipine (not depicted). (F) Only background labeling was apparent when in situ hybridization was performed with a CLN2 mRNA "sense strand" control probe. Number of cells analyzed: (A) 12 neurons, 49 dendrites; (B) 13 neurons, 48 dendrites; (C) 10 neurons, 33 dendrites; (D) 11 neurons, 37 dendrites. Bar, 50  $\mu\text{m}$ . (E) Quantitative analysis. One-way ANOVA, Dunnett's post hoc analysis (comparison of RNA levels in the basal state with RNA levels after  $\beta$ -adrenergic activation and after  $\beta$ -adrenergic activation in the presence of BAPTA-AM or nifedipine): comparison with isoproterenol (B),  $P < 0.001$  for all interval points; comparison with isoproterenol/BAPTA-AM (C),  $P > 0.7$  for interval points at 50  $\mu\text{m}$ ; comparison with isoproterenol/nifedipine (D),  $P > 0.8$  for interval points at 50  $\mu\text{m}$ . Error bars indicate SEM.
